# Supplementary material for: Reversible pressure pre-amorphization of a piezochromic metal–organic framework
Source: Royal Society of Chemistry journal article supplement (doi:10.1039/c7dt02511d), 2017-01-01
Supplement: c7dt02511d2.pdf [file c7dt02511d2.pdf]

## Supplementary Information

# Reversible Pressure Amorphization of a Piezochromic Metal-Organic Framework

*Michał Andrzejewski,<sup>†</sup> Nicola Casati,<sup>‡</sup> Andrzej Katrusiak<sup>†\*</sup>*

<sup>†</sup>Faculty of Chemistry, Adam Mickiewicz University, Umultowska 89b, 61-614 Poznan,  
Poland

<sup>‡</sup>Swiss Light Source, Paul Scherrer Institute, CH-5232 Villigen, Switzerland

\*Corresponding author: [katran@amu.edu.pl](mailto:katran@amu.edu.pl)

**Keywords:** piezochromism, amorphization, metal-organic framework, high-pressure

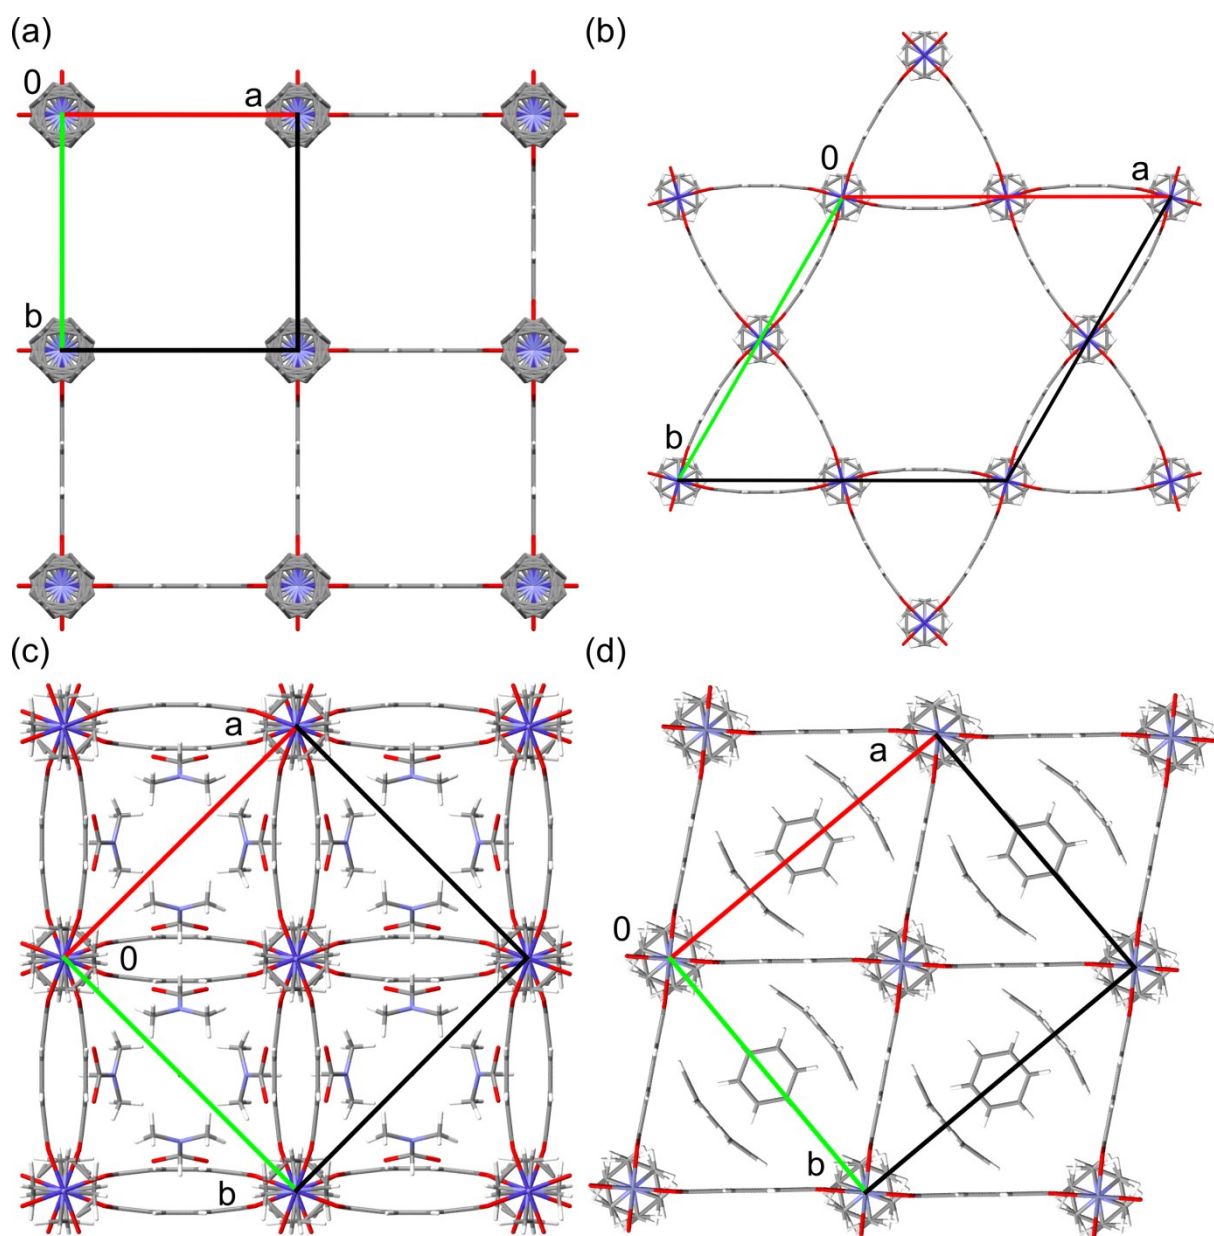

**Figure S1.** (a) The crystal structure of  $\text{Co}_2(\text{Bdc})_2\text{Dabco}$  polymorph I and (b) polymorph II with kagome-type lattice; and guest-dependent structural transformation of polymorph I host structure with (c) DMF and water and (d) benzene.

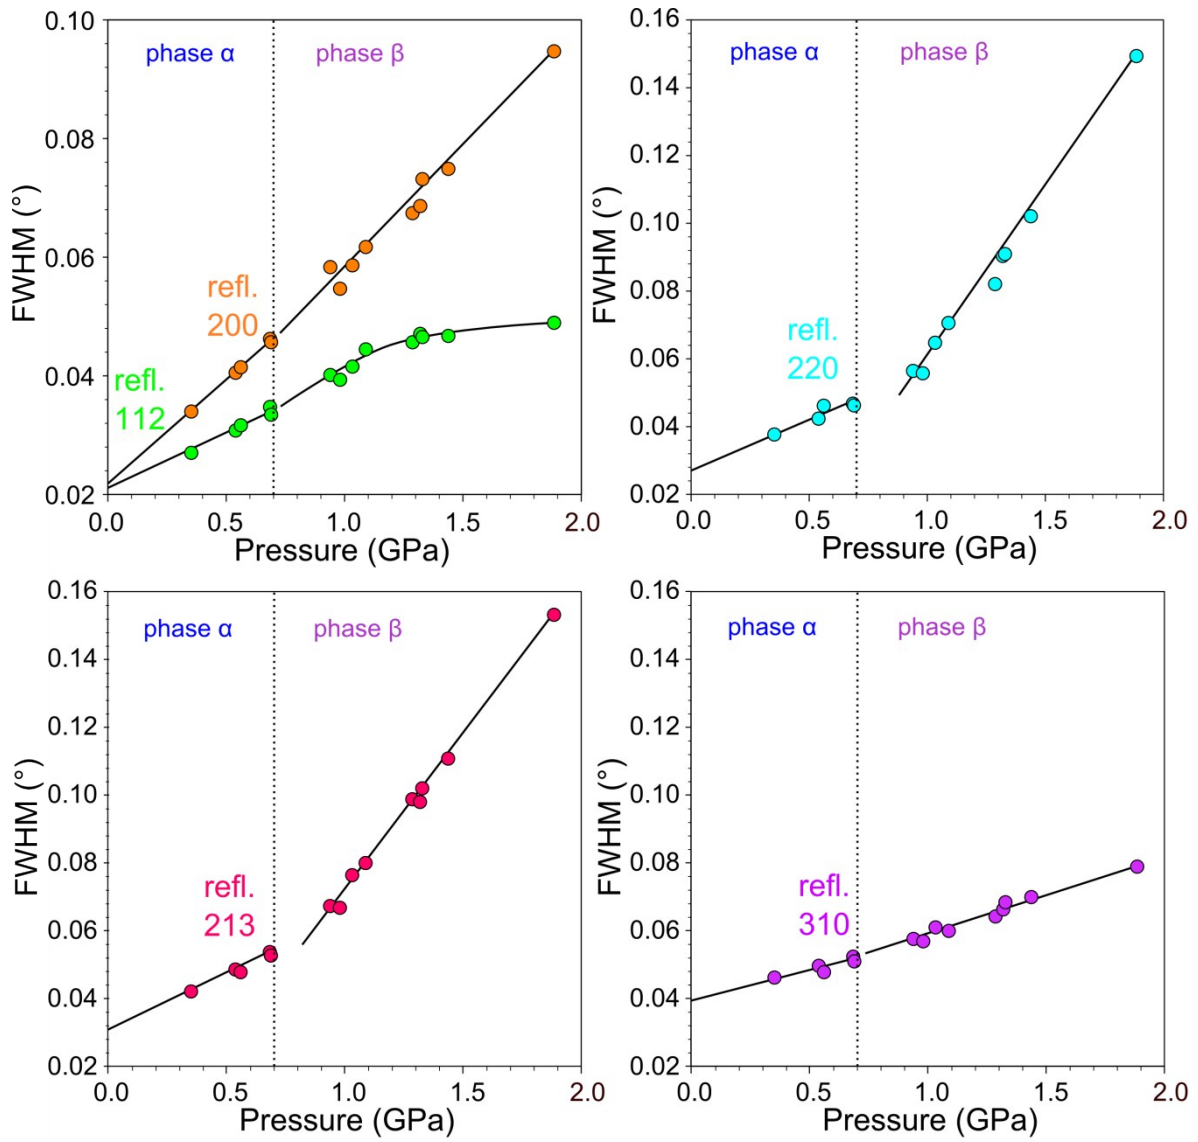

**Figure S2.** Full width at half maximum (FWHM) of main reflections for  $\alpha$  and  $\beta$  phases plotted in a function of pressure.

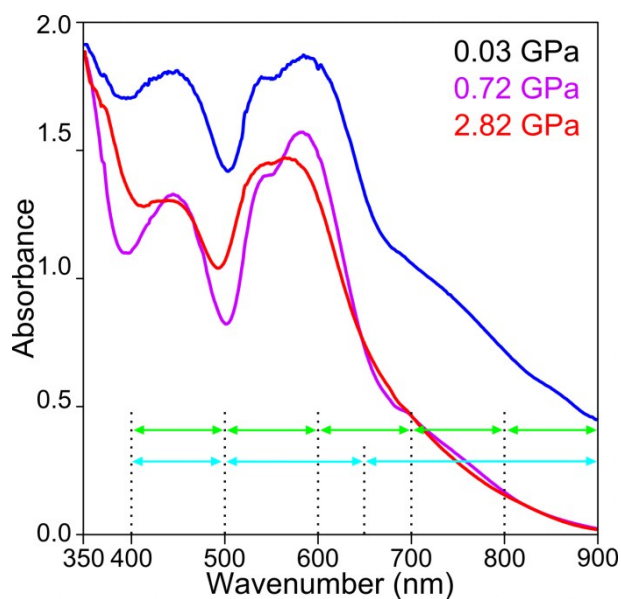

**Figure S3.** High-pressure VIS spectra of  $\text{Co}_2(\text{Bdc})_2\text{Dabco}\cdot 4\text{DMF}\cdot \text{H}_2\text{O}$  divided into main regions to integrate the signal ( $\Delta\lambda=100\text{nm}$  in green and  $\Delta\lambda=\text{diverse}$  in cyan arrows, *cf.* Table S1).

**Table S1.** Integrated areas of  $\text{Co}_2(\text{Bdc})_2\text{Dabco}\cdot 4\text{DMF}\cdot \text{H}_2\text{O}$  visible light absorption spectra. Area of three main peaks was highlighted in red (cyan arrows in Figure S3).

| Phase                 | 400-500 | 500-600 | 600-700 | 700-800 | 800-900 | 500-650 | 650-900 |
|-----------------------|---------|---------|---------|---------|---------|---------|---------|
| $\alpha$ at 0.03 GPa  | 218     | 222     | 187     | 137     | 102     | 323     | 317     |
| $\beta$ at 0.72 GPa   | 163     | 184     | 122     | 71      | 52      | 256     | 176     |
| amorphous at 2.82 GPa | 165     | 183     | 123     | 71      | 52      | 251     | 173     |
| <b>Change in %</b>    |         |         |         |         |         |         |         |
| $\alpha$ to $\beta$   | -25.3   | -17.2   | -34.8   | -48.2   | -49.0   | -20.8   | -44.5   |
| $\alpha$ to amorphous | -24.3   | -17.6   | -34.3   | -48.2   | -49.0   | -22.3   | -45.4   |
| $\beta$ to amorphous  | 1.2     | -0.6    | 0.9     | 0       | 0       | -2.1    | -1.7    |

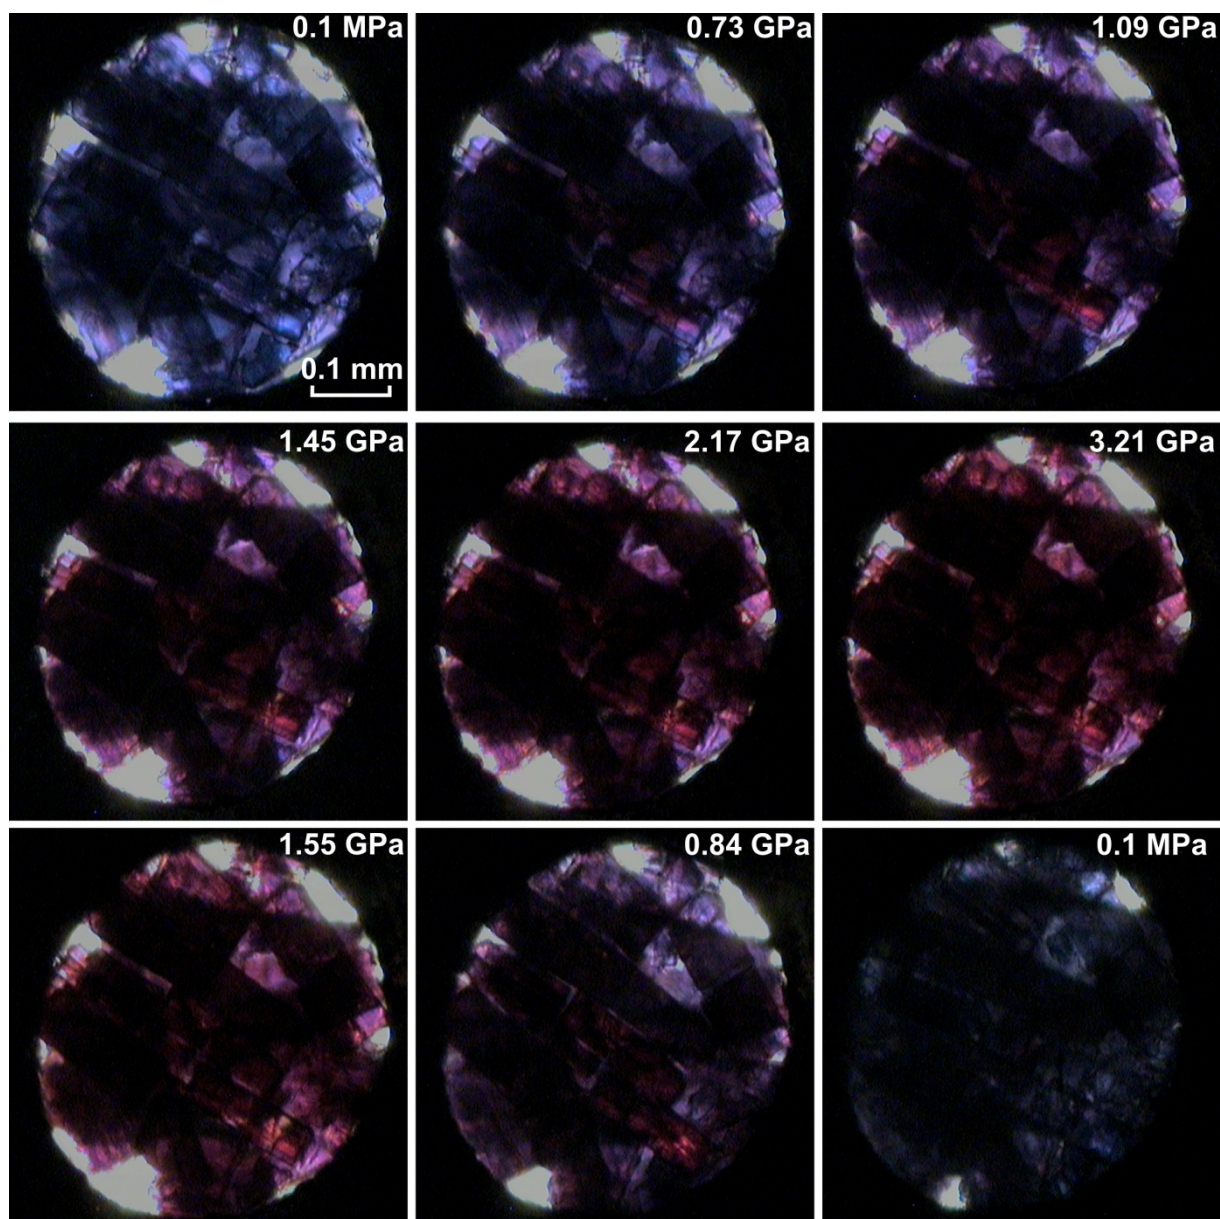

**Figure S4.** Single crystals of  $\text{Co}_2(\text{Bdc})_2\text{Dabco}\cdot 4\text{DMF}\cdot \text{H}_2\text{O}$  in a DAC during high-pressure spectroscopic measurements.

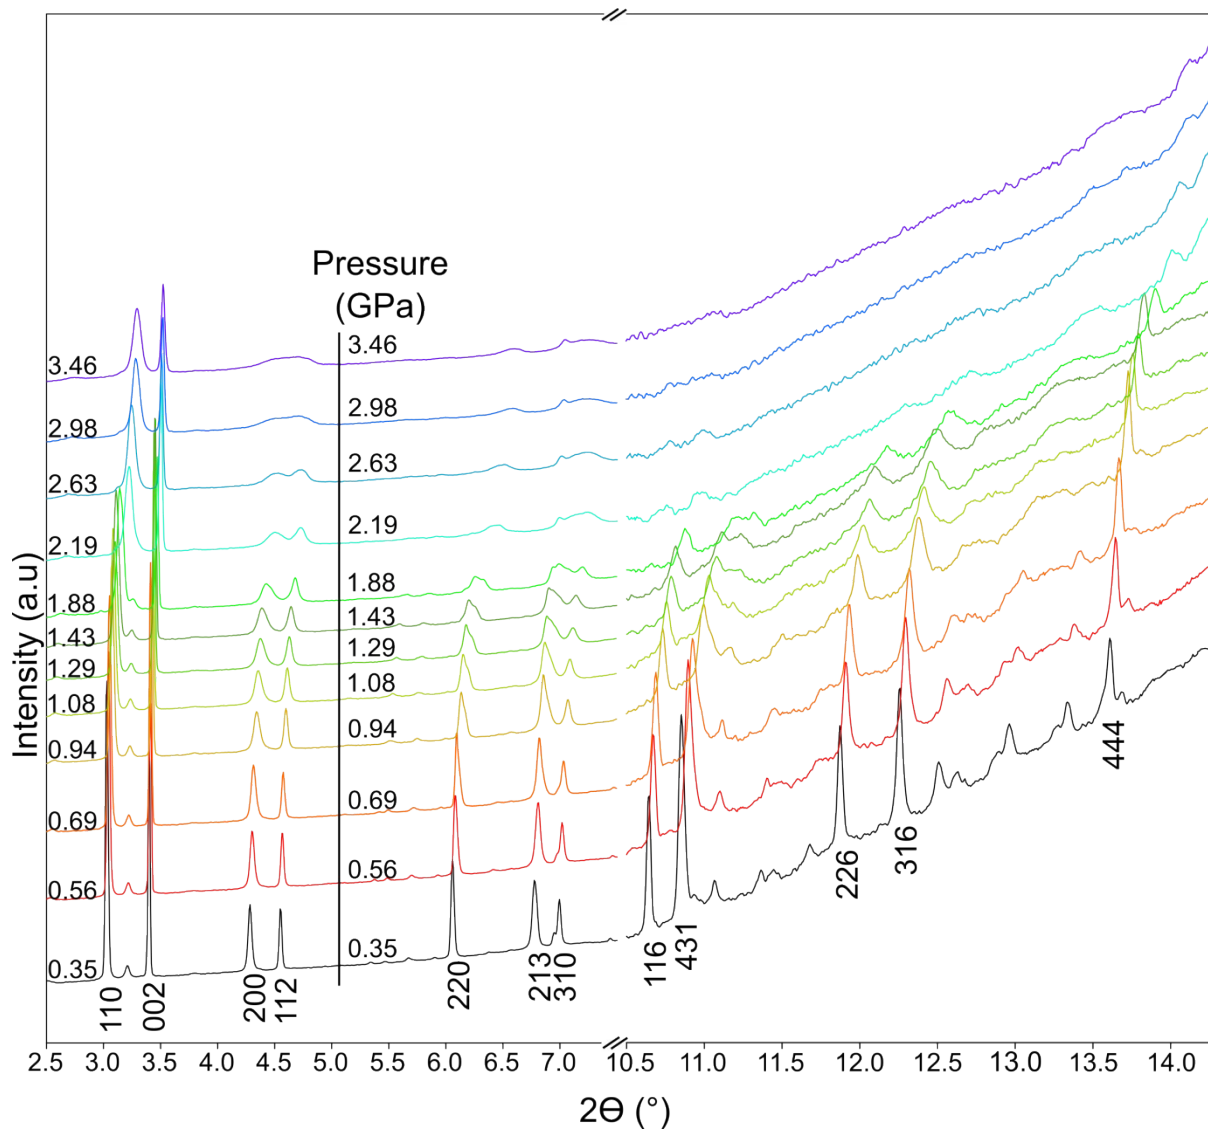

**Figure S5.** High-pressure powder XRD patterns of  $\text{Co}_2(\text{Bdc})_2\text{Dabco}\cdot 4\text{DMF}\cdot \text{H}_2\text{O}$ , measured with synchrotron radiation.

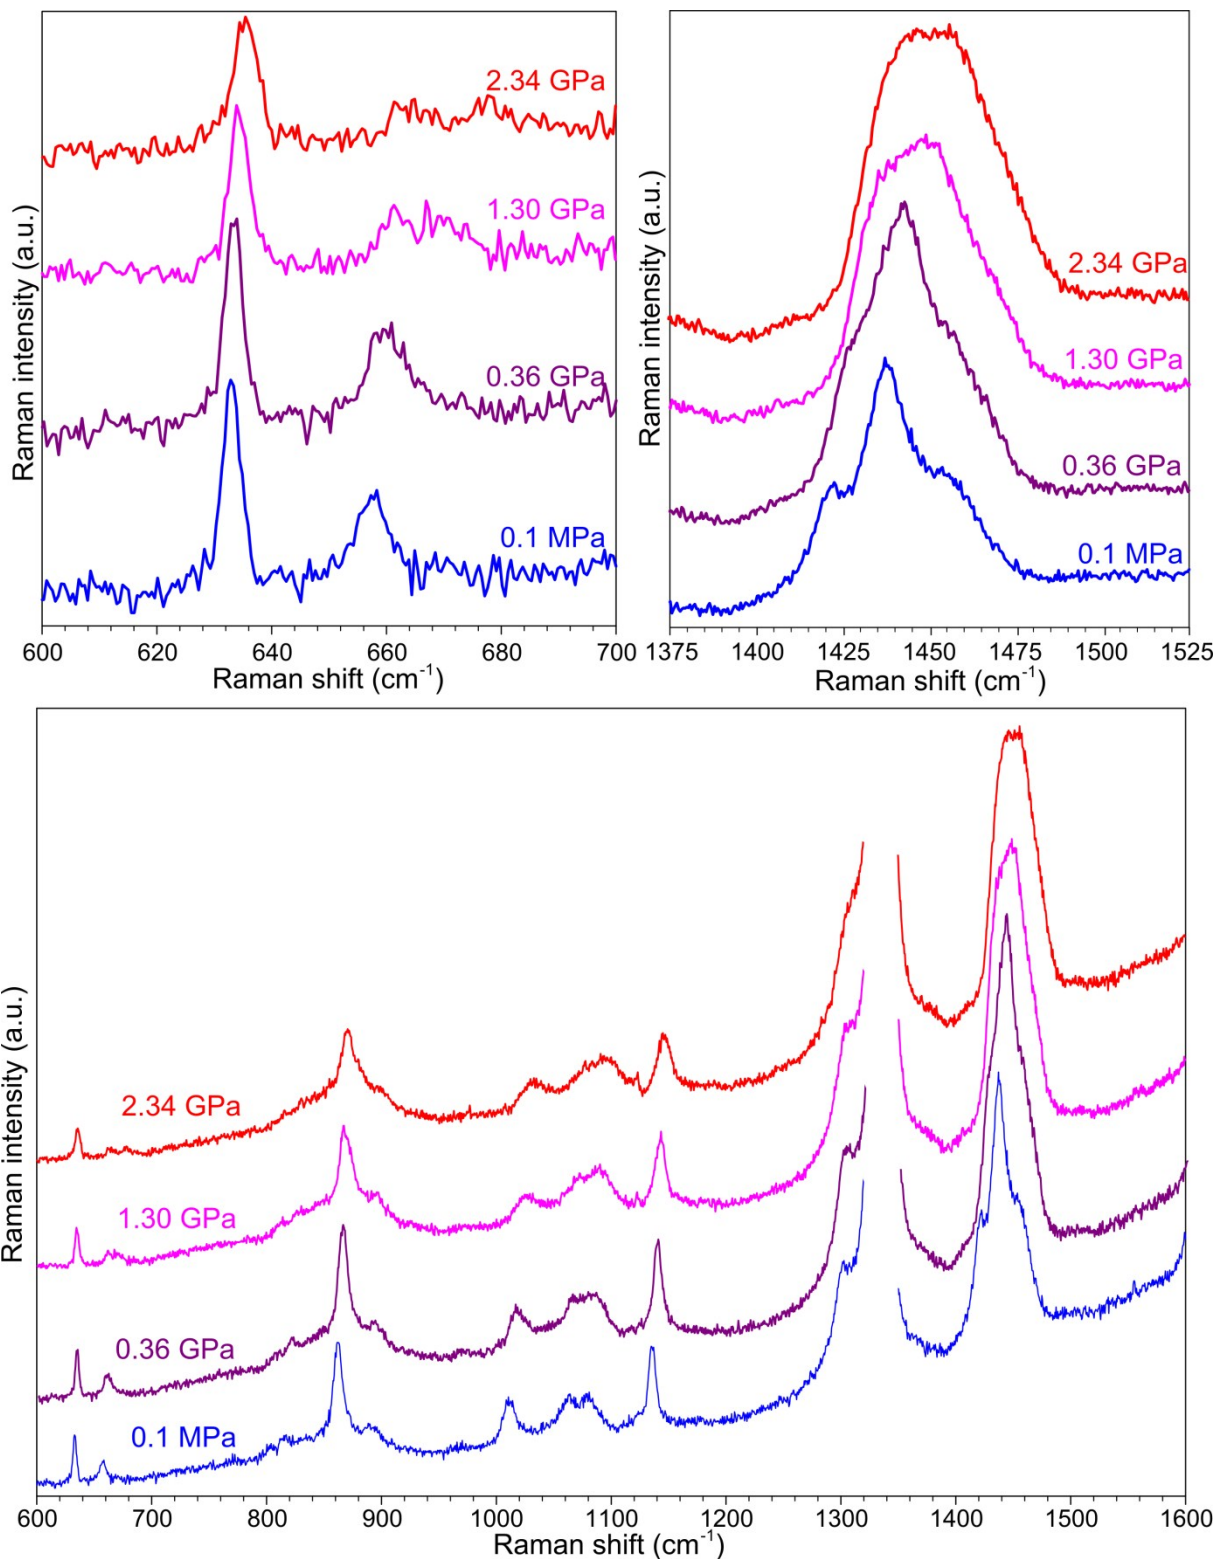

**Figure S6.** High-pressure Raman spectra of  $\text{Co}_2(\text{Bdc})_2\text{Dabco}\cdot 4\text{DMF}\cdot \text{H}_2\text{O}$  measured in Daphne oil.

**Table S2.** Detailed crystallographic data of Co<sub>2</sub>(Bdc)<sub>2</sub>Dabco·4DMF·H<sub>2</sub>O single crystal measured in a function of temperature.

| Phase                                                              | $\alpha$               |
|--------------------------------------------------------------------|------------------------|------------------------|------------------------|------------------------|------------------------|------------------------|------------------------|
| <i>p</i> (GPa)                                                     | 0.1 MPa                |
| <i>T</i> (K)                                                       | 296                    | 273                    | 250                    | 220                    | 180                    | 150                    | 100                    |
| Wavelength (Å)                                                     | 0.71073                | 0.71073                | 0.71073                | 0.71073                | 0.71073                | 0.71073                | 0.71073                |
| Crystal system                                                     | Tetragonal             |
| Space group                                                        | <i>I4/mcm</i>          |
| <i>a</i>                                                           | 15.2794(13)            | 15.2735(15)            | 15.2626(16)            | 15.2554(15)            | 15.2439(18)            | 15.2363(17)            | 15.2236(19)            |
| <i>b</i>                                                           | 15.2794(13)            | 15.2735(15)            | 15.2626(16)            | 15.2554(15)            | 15.2439(18)            | 15.2363(17)            | 15.2236(19)            |
| <i>c</i>                                                           | 18.9886(14)            | 18.9723(15)            | 18.9551(15)            | 18.9276(15)            | 18.9276(15)            | 18.8931(15)            | 18.8603(16)            |
| Volume (Å <sup>3</sup> )                                           | 4433.1(8)              | 4425.8(9)              | 4415.5(10)             | 4405.0(9)              | 4393.7(11)             | 4386.0(10)             | 4371.1(11)             |
| <i>Z/Z'</i>                                                        | 4 / 0.125              | 4 / 0.125              | 4 / 0.125              | 4 / 0.125              | 4 / 0.125              | 4 / 0.125              | 4 / 0.125              |
| Calculated density (g/cm <sup>3</sup> )                            | 1.095                  | 1.096                  | 1.099                  | 1.102                  | 1.104                  | 1.109                  | 1.113                  |
| Absorption coefficient (mm <sup>-1</sup> )                         | 0.789                  | 0.790                  | 0.792                  | 0.794                  | 0.794                  | 0.796                  | 0.791                  |
| <i>F</i> (000)                                                     | 1536                   | 1536                   | 1536                   | 1536                   | 1536                   | 1536                   | 1536                   |
| Crystal size (mm)                                                  | 0.2 x 0.2 x 0.5        |
| $\theta$ -range for data collection (°)                            | 5.712 – 57.78          | 5.716 – 58.828         | 5.72 – 57.884          | 6.86 – 57.962          | 6.352 – 58.026         | 6.356 – 58.072         | 5.744 – 53.964         |
| Min/max indices:h, k, l                                            | -20/19, -19/14, -23/25 | -20/19, -19/14, -23/25 | -14/19, -19/20, -25/23 | -14/19, -19/20, -25/22 | -19/20, -19/14, -25/22 | -14/19, -20/19, -22/15 | -14/18, -19/19, -22/24 |
| Reflect. Collected/unique                                          | 11395/1507             | 11401/1505             | 11321/1500             | 11279/1490             | 11251                  | 1116                   | 10750                  |
| Rint                                                               | 0.2246                 | 0.2320                 | 0.2291                 | 0.2304                 | 0.2426                 | 0.2498                 | 0.2553                 |
| Completeness (%)                                                   | 94.96                  | 94.83                  | 94.52                  | 94.14                  | 93.18                  | 93.83                  | 99.69                  |
| Data/ parameters/restrains                                         | 1507/13/55             | 1505/18/55             | 1500/12/59             | 1490 / 0 / 52          | 1482 / 12 / 60         | 1488 / 19 / 62         | 1295 / 12 / 62         |
| Goodness-of-fit on F2                                              | 1.059                  | 1.006                  | 1.079                  | 1.081                  | 1.065                  | 1.037                  | 1.027                  |
| Final R1/wR2 ( <i>I</i> >2 $\sigma$ 1)                             | 0.0830 / 0.2008        | 0.1134 / 0.3037        | 0.0972 / 0.2151        | 0.1367 / 0.3149        | 0.0963 / 0.2076        | 0.1395 / 0.3433        | 0.0931 / 0.2088        |
| R1/wR2 (all data)                                                  | 0.1726 / 0.2375        | 0.2434 / 0.3818        | 0.1870 / 0.2540        | 0.2744 / 0.4026        | 0.1877 / 0.2444        | 0.2862 / 0.4481        | 0.1785 / 0.2296        |
| Weighting parameters <i>w</i> <sub>1</sub> , <i>w</i> <sub>2</sub> | 0.087 / 0              | 0.2 / 0                | 0.095 / 0              | 0.075 / 0              | 0.092 / 0              | 0.250 / 0              | 0.098 / 0              |
| Largest diff. peak/hole (e.Å <sup>-3</sup> )                       | 0.73 / -0.54           | 1.31 / -0.52           | 1.35 / -0.65           | 3.70 / -1.42           | 1.86 / -0.97           | 0.92 / -0.33           | 1.70 / -0.79           |



**Table S3.** Detailed crystallographic data of high-pressure  $\text{CO}_2(\text{Bdc})_2\text{Dabco}\cdot 4\text{DMF}\cdot \text{H}_2\text{O}$  phases extracted from powder XRD measurements.Unit-cell dimensions for  $\beta$ -phase were averaged to the orthorhombic system.

| Phase                       | $\alpha$    | $\alpha$   | $\alpha$   | $\alpha$   | $\alpha$   | $\alpha$   | $\beta$   | $\beta$   | $\beta$   | $\beta$   |
|-----------------------------|-------------|------------|------------|------------|------------|------------|-----------|-----------|-----------|-----------|
| $p$ (GPa)                   | 0.1 MPa     | 0.3525     | 0.5399     | 0.5616     | 0.6853     | 0.6897     | 0.9399    | 0.9812    | 1.0899    | 1.2872    |
| $T$ (K)                     | 296         | 296        | 296        | 296        | 296        | 296        | 296       | 296       | 296       | 296       |
| Wavelength ( $\text{\AA}$ ) | 0.71073     | 0.56338    | 0.56338    | 0.56338    | 0.56338    | 0.56338    | 0.56338   | 0.56338   | 0.56338   | 0.56338   |
| Crystal system              | Tetragonal  | Tetragonal | Tetragonal | Tetragonal | Tetragonal | Tetragonal | -         | -         | -         | -         |
| Space group                 | I4/mcm      | I4/mcm     | I4/mcm     | I4/mcm     | I4/mcm     | I4/mcm     | -         | -         | -         | -         |
| $a$                         | 15.2794(13) | 15.0522    | 14.9815    | 14.9807    | 14.9302    | 14.9365    | 14.8148   | 14.8026   | 14.7538   | 14.6911   |
| $b$                         | 15.2794(13) | 15.0522    | 14.9815    | 14.9807    | 14.9302    | 14.9365    | 14.8518   | 14.8322   | 14.7955   | 14.7289   |
| $c$                         | 18.9886(14) | 18.9757    | 18.9208    | 18.9221    | 18.8968    | 18.9012    | 18.8207   | 18.8136   | 18.7771   | 18.7204   |
| Volume ( $\text{\AA}^3$ )   | 4433.1(8)   | 4299.3112  | 4246.6528  | 4246.5573  | 4212.3098  | 4216.8626  | 4141.4(8) | 4130.6(3) | 4098.8(3) | 4050.7(5) |
| $Z/Z'$                      | 4 / 0.125   | 4 / 0.125  | 4 / 0.125  | 4 / 0.125  | 4 / 0.125  | 4 / 0.125  | 4 / 0.125 | 4 / 0.125 | 4 / 0.125 | 4 / 0.125 |

**Table S3.** Continued, for the amorphous phase volume and unit-cell parameters were calculated from 110 and 002 reflections,  $pA$ =pre-amorphous phase (*cf.* Figure S5).

| Phase                       | $\beta$   | $\beta$   | $\beta$   | $pA$      | $pA$      | $pA$      | $pA$      | $pA$      | $pA$      |
|-----------------------------|-----------|-----------|-----------|-----------|-----------|-----------|-----------|-----------|-----------|
| $p$ (GPa)                   | 1.3194    | 1.4383    | 1.8858    | 2.1800    | 2.2900    | 2.6100    | 2.9500    | 3.0900    | 3.4300    |
| $T$ (K)                     | 296       | 296       | 296       | 296       | 296       | 296       | 296       | 296       | 296       |
| Wavelength ( $\text{\AA}$ ) | 0.56338   | 0.56338   | 0.56338   | 0.56338   | 0.56338   | 0.56338   | 0.56338   | 0.56338   | 0.56338   |
| Crystal system              | -         | -         | -         | -         | -         | -         | -         | -         | -         |
| Space group                 | -         | -         | -         | -         | -         | -         | -         | -         | -         |
| $a$                         | 14.6733   | 14.6305   | 14.4604   | 14.1713   | 14.0733   | 13.9052   | 13.9003   | 13.8880   | 13.8691   |
| $b$                         | 14.7152   | 14.6703   | 14.5203   | 14.2318   | 14.1526   | 14.0257   | 13.9821   | 13.9617   | 13.9332   |
| $c$                         | 18.7182   | 18.6812   | 18.5827   | 18.4554   | 18.4177   | 18.3601   | 18.3569   | 18.3478   | 18.3400   |
| Volume ( $\text{\AA}^3$ )   | 4041.6(6) | 4009.6(8) | 3901.2(8) | 3706.3481 | 3647.7500 | 3550.0289 | 3546.9105 | 3538.8924 | 3527.7621 |
| $Z/Z'$                      | 4 / 0.125 | 4 / 0.125 | 4 / 0.125 | -         | -         | -         | -         | -         | -         |
